# Supplementary material
Source: publisher figshare collection journal article supplement (https://asha.figshare.com/articles/dataset/_/14110280)
Supplement: Supplementary file 1 [file 1]

**Supplemental Material S2.** Descriptive and inferential statistics of the four possible subgroups.

| Factor                    | Group         | <i>N</i> | Min. | Max. | <i>M</i> | <i>SD</i> | <i>Mdn</i> | <i>Mdn</i><br>Absolute<br>Deviation | Significant Pairwise Comparisons         |
|---------------------------|---------------|----------|------|------|----------|-----------|------------|-------------------------------------|------------------------------------------|
| Age<br>(years;<br>months) | Total         | 80       | 7;0  | 16;8 | 10;11    | 2;3       | 10;4       | 1;10                                |                                          |
|                           | Agree - CAS   | 13       | 9;0  | 15;6 | 11;0     | 2;4       | 9;8        | 1;1                                 |                                          |
|                           | MRR-Tri Only  | 26       | 7;0  | 16;8 | 11;0     | 2;4       | 10;9       | 2;2                                 |                                          |
|                           | SRT Only      | 7        | 9;1  | 13;2 | 10;6     | 1;5       | 10;3       | 1;6                                 |                                          |
|                           | Agree- No CAS | 34       | 7;10 | 16;3 | 10;11    | 2;3       | 10;3       | 1;8                                 |                                          |
| PPVT-4<br>Std Score       | Total*        | 80       | 56   | 154  | 105.8    | 16.5      | 107        | 15.6                                |                                          |
|                           | Agree - CAS   | 13       | 61   | 137  | 97       | 18.5      | 95         | 13.3                                | Agree - CAS < Agree - No CAS, $p = .033$ |
|                           | MRR-Tri Only  | 26       | 56   | 126  | 102.5    | 17.5      | 104.5      | 14.1                                |                                          |
|                           | SRT Only      | 7        | 95   | 110  | 103      | 6.6       | 103        | 10.4                                |                                          |
|                           | Agree- No CAS | 34       | 87   | 154  | 112.3    | 14.3      | 112.3      | 11.1                                |                                          |
| GFTA-2<br>Std Score       | Total         | 29       | 40   | 83   | 65.1     | 14.3      | 70         | 14.8                                |                                          |
|                           | Agree - CAS   | 3        | 40   | 73   | 53       | 17.6      | 46         | 8.9                                 |                                          |



|                                                           |               |    |       |      |      |      |      |      |                                                                                                                                  |
|-----------------------------------------------------------|---------------|----|-------|------|------|------|------|------|----------------------------------------------------------------------------------------------------------------------------------|
| CTOPP-2<br>Blending<br>Words<br>Scaled<br>Score           | Total *       | 51 | 2     | 16   | 8.3  | 2.8  | 8    | 3.0  |                                                                                                                                  |
|                                                           | Agree - CAS   | 11 | 4     | 11   | 6.6  | 2.0  | 6    | 1.5  | Agree - CAS < Agree - No CAS, $p = .026$                                                                                         |
|                                                           | MRR-Tri Only  | 17 | 4     | 16   | 8.4  | 3.2  | 8    | 3.0  |                                                                                                                                  |
|                                                           | SRT Only      | 6  | 6     | 12   | 8.5  | 2.4  | 8.5  | 3.0  |                                                                                                                                  |
|                                                           | Agree- No CAS | 17 | 2     | 15   | 9.2  | 2.7  | 9    | 1.5  |                                                                                                                                  |
| CTOPP-2<br>Phonemic<br>Isolation<br>Scaled<br>Score       | Total         | 48 | 2     | 13   | 7.5  | 2.6  | 7    | 3.0  |                                                                                                                                  |
|                                                           | Agree - CAS   | 11 | 2     | 10   | 6.3  | 2.8  | 5    | 4.4  |                                                                                                                                  |
|                                                           | MRR-Tri Only  | 17 | 4     | 13   | 7.5  | 2.6  | 7    | 1.5  |                                                                                                                                  |
|                                                           | SRT Only      | 6  | 3     | 9    | 7    | 2.3  | 7.5  | 2.2  |                                                                                                                                  |
|                                                           | Agree- No CAS | 14 | 4     | 13   | 8.5  | 2.5  | 9    | 2.2  |                                                                                                                                  |
| Nonword<br>Repetition<br>Percent<br>Consonants<br>Correct | Total *       | 79 | 7     | 98.9 | 82   | 17.4 | 87   | 8.4  |                                                                                                                                  |
|                                                           | Agree - CAS   | 13 | 0     | 88.5 | 58.6 | 31.2 | 66.7 | 26.2 | Agree - CAS < Agree - No CAS, $p < .0001$<br>MRR-Tri Only < Agree - No CAS, $p < .0001$<br>SRT Only < Agree - No CAS, $p = .037$ |
|                                                           | MRR-Tri Only  | 26 | 17.7  | 95.8 | 78.4 | 16.9 | 82.8 | 10.9 |                                                                                                                                  |
|                                                           | SRT Only      | 7  | 71.86 | 90.6 | 84.4 | 6.7  | 85.4 | 7.7  |                                                                                                                                  |
|                                                           | Agree- No CAS | 34 | 75    | 99   | 90.8 | 5.6  | 91.8 | 6.0  |                                                                                                                                  |
| CELF-5<br>Recalling<br>Sentences<br>Scaled<br>Score       | Total         | 51 | 1     | 18   | 9.5  | 4    | 9    | 4.5  |                                                                                                                                  |

|                                                      |               |    |    |    |      |       |      |      |
|------------------------------------------------------|---------------|----|----|----|------|-------|------|------|
|                                                      | Agree - CAS   | 10 | 1  | 18 | 7.8  | 5.4   | 6.5  | 4.5  |
|                                                      | MRR-Tri Only  | 18 | 5  | 16 | 10.0 | 3.1   | 9.5  | 3.0  |
|                                                      | SRT Only      | 6  | 4  | 10 | 7.3  | 2.2   | 11   | 0    |
|                                                      | Agree- No CAS | 17 | 2  | 18 | 10.5 | 4.1   | 11   | 3.0  |
| <hr/>                                                |               |    |    |    |      |       |      |      |
| CELF-5<br>Formulated<br>Sentences<br>Scaled<br>Score | Total         | 28 | 1  | 17 | 10.2 | 3.5   | 10   | 3.0  |
|                                                      | Agree - CAS   | 3  | 7  | 9  | 8.3  | 1.2   | 9    | 0    |
|                                                      | MRR-Tri Only  | 10 | 7  | 16 | 10.1 | 2.6   | 10   | 3.0  |
|                                                      | SRT Only      | 1  | 11 | 11 | 11   | NA    | 11   | 0    |
|                                                      | Agree- No CAS | 14 | 1  | 17 | 10.6 | 4.4   | 10.5 | 5.1  |
| <hr/>                                                |               |    |    |    |      |       |      |      |
| WASI-2<br>Matrix<br>Reasoning<br>T-Score             | Total *       | 79 | 14 | 73 | 46.7 | 11.8  | 47   | 11.9 |
|                                                      | Agree - CAS   | 12 | 20 | 62 | 40.7 | 13.05 | 40   | 16.3 |
|                                                      | MRR-Tri Only  | 26 | 14 | 61 | 43.7 | 12.25 | 44.5 | 11.1 |
|                                                      | SRT Only      | 7  | 34 | 55 | 45.4 | 7.02  | 46   | 8.9  |
|                                                      | Agree- No CAS | 34 | 30 | 73 | 51.3 | 10.31 | 53   | 11.1 |

*Note:* Totals marked with (\*) indicate a significant omnibus Kruskal-Wallis test indicating that at least one group median is different from the others at  $\alpha = .05$ .

All significant pairwise comparisons, completed using the two-tailed Wilcoxon Ranked Sum test, are indicated in the last column. Holm's alpha correction was used.
